# Supplementary material
Source: PubMed Central journal article supplement (PMC6643910)
Supplement: ao6b00251_si_001.pdf [file ao6b00251_si_001.pdf]

## Supplementary Information

### Novel Adamantanyl Based Thiadiazolyl-Pyrazoles Targeting EGFR in Triple Negative Breast Cancer

Anusha Sebastian,<sup>a,#</sup> Vijay Pandey,<sup>b,#</sup> Chakrabhavi Dhananjaya Mohan,<sup>c,d,#</sup> Yi Ting Chia,<sup>b</sup> Shobith Rangappa,<sup>e</sup> Jessin Mathai,<sup>f</sup> Baburajeev CP,<sup>a</sup> Shardul Paricharak,<sup>g,h</sup> Lewis H. Mervin,<sup>g</sup> Krishna C. Bulusu,<sup>g</sup> Julian E. Fuchs,<sup>g</sup> Andreas Bender,<sup>g</sup> Shuhei Yamada,<sup>i</sup> Basappa,<sup>a,\*</sup> Peter E. Lobie,<sup>b,\*</sup> Kanchugarakoppal S. Rangappa<sup>c,\*</sup>

<sup>a</sup>Laboratory of Chemical Biology, Department of Chemistry, Bangalore University, Central College campus, Palace Road, Bangalore-560001, India;

<sup>b</sup>Cancer Science Institute of Singapore, and Department of Pharmacology, 14 Medical Drive #11-02, MD6, National University of Singapore, Singapore 117599;

<sup>c</sup>Department of Studies in Chemistry, University of Mysore, Manasagangotri, Mysore-570006, India;

<sup>d</sup>Department of Studies in Molecular Biology, University of Mysore, Manasagangotri, Mysore-570006, India;

<sup>e</sup>Frontier Research Center for Post-Genome Science and Technology, Hokkaido University, Sapporo 060-0808, Japan;

<sup>f</sup>Centre for Advanced Biomedical Research and Innovation, Gulf Medical University, Ajman-4184, United Arab Emirates;

<sup>g</sup>Centre for Molecular Informatics, Department of Chemistry, University of Cambridge, Lensfield Road, CB2 1EW, Cambridge, United Kingdom;

<sup>h</sup>Division of Medicinal Chemistry, Leiden Academic Centre for Drug Research, Leiden University, P.O. Box 9502, 2300 RA Leiden, The Netherlands;

<sup>i</sup>Department of Pathobiochemistry, Faculty of Pharmacy, Meijo University, Nagoyo 468-8503, Japan;

<sup>#</sup>Contributed Equally

\*Corresponding authors

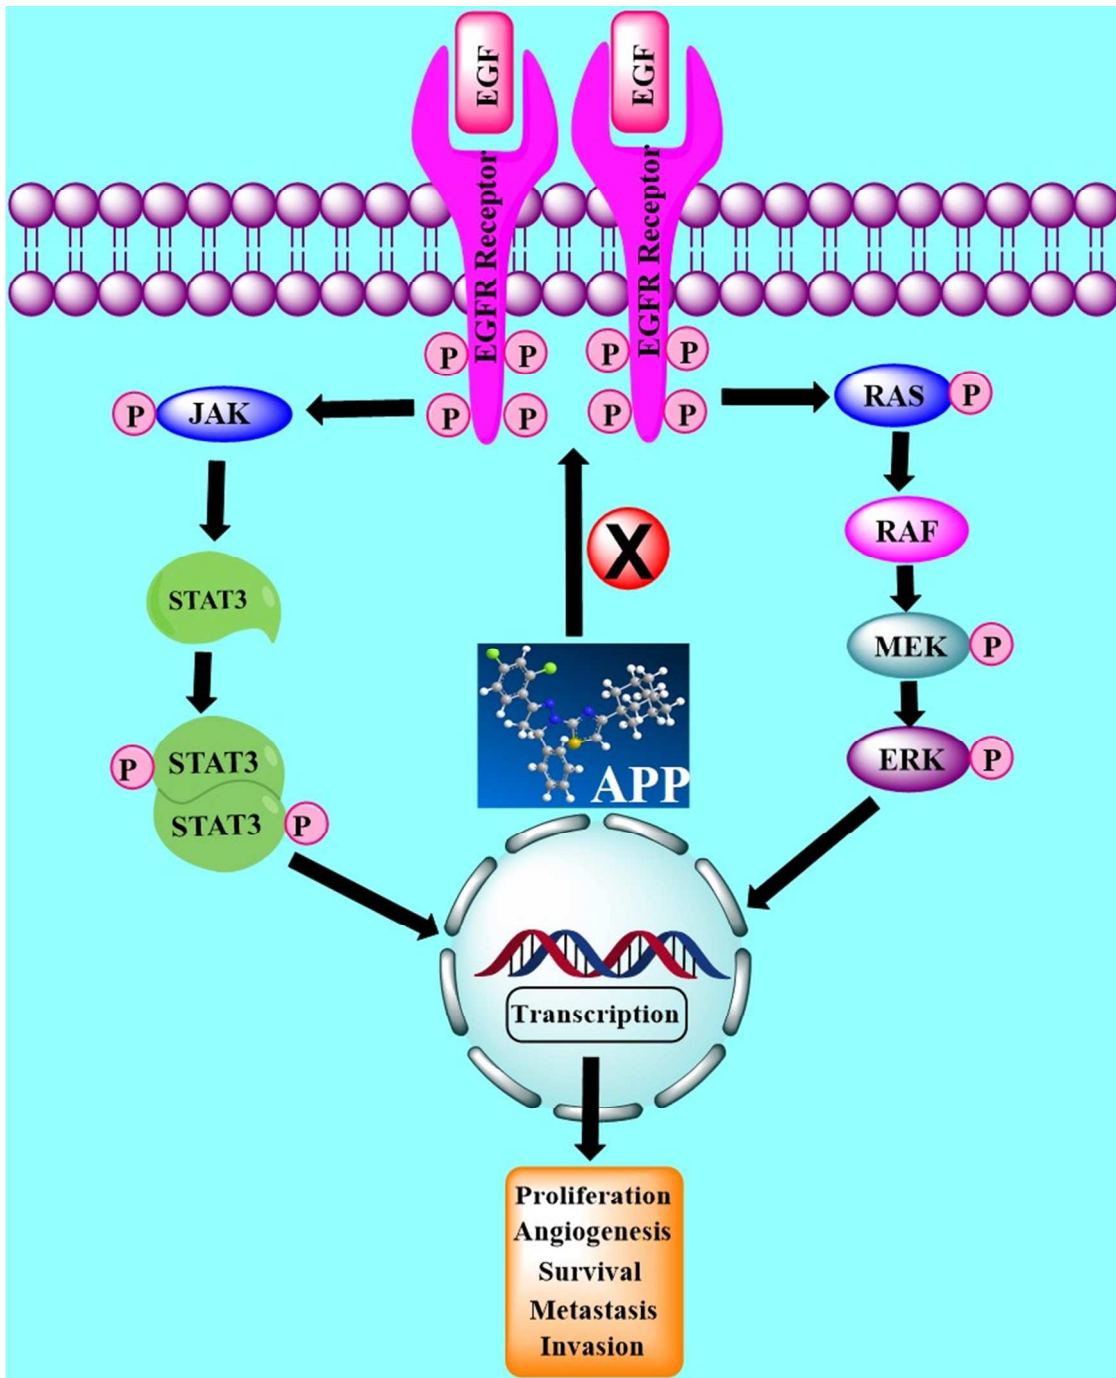

**Figure S1: Overview of EGFR signaling and mechanism of action of the lead molecule (APP)**

**Table S1: Physical parameters for the newly synthesized compounds 3(a-l).**

| Sl. No | Chalcone (1a-l)                                                                     | Product <sup>a</sup> (3a-l)                                                                | Yield <sup>b</sup> (%) |
|--------|-------------------------------------------------------------------------------------|--------------------------------------------------------------------------------------------|------------------------|
| 1      | 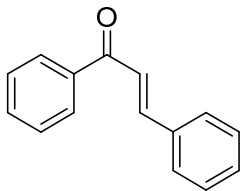   | <br>3a   | 93                     |
| 2      |    | <br>3b   | 87                     |
| 3      |   | <br>3c  | 85                     |
| 4      |  | <br>3d | 87                     |
| 5      |  | <br>3e | 90                     |

|    |                                                                                     |                                                                                            |    |
|----|-------------------------------------------------------------------------------------|--------------------------------------------------------------------------------------------|----|
| 6  | 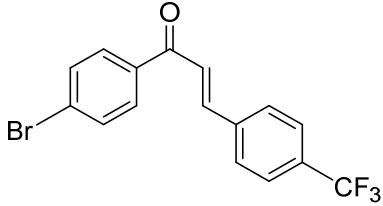   | <br>3f   | 93 |
| 7  |    | <br>3g   | 89 |
| 8  |    | <br>3h   | 84 |
| 9  |   | <br>3i  | 89 |
| 10 |  | <br>3j | 89 |
| 11 |  | <br>3k | 91 |

|                                                                                                                                                                                                                                                                      |                                                                                   |                                                                                                                          |    |
|----------------------------------------------------------------------------------------------------------------------------------------------------------------------------------------------------------------------------------------------------------------------|-----------------------------------------------------------------------------------|--------------------------------------------------------------------------------------------------------------------------|----|
| 12                                                                                                                                                                                                                                                                   | 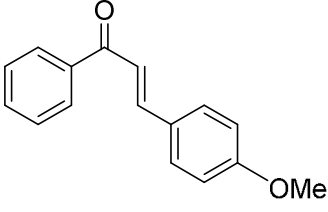 |  <p style="text-align: center;">31</p> | 86 |
| <p><sup>a</sup> Reaction conditions; chalcone (1eq) in [BMIM][BF<sub>4</sub>] (5ml), thiosemicarbazide (1.2eq), piperidine (2-3 drops) and 2-(adamantan-1-yl)acetyl bromide (1eq), 6 h at 80 °C. <sup>b</sup>Product yield after recrystallisation from ethanol.</p> |                                                                                   |                                                                                                                          |    |

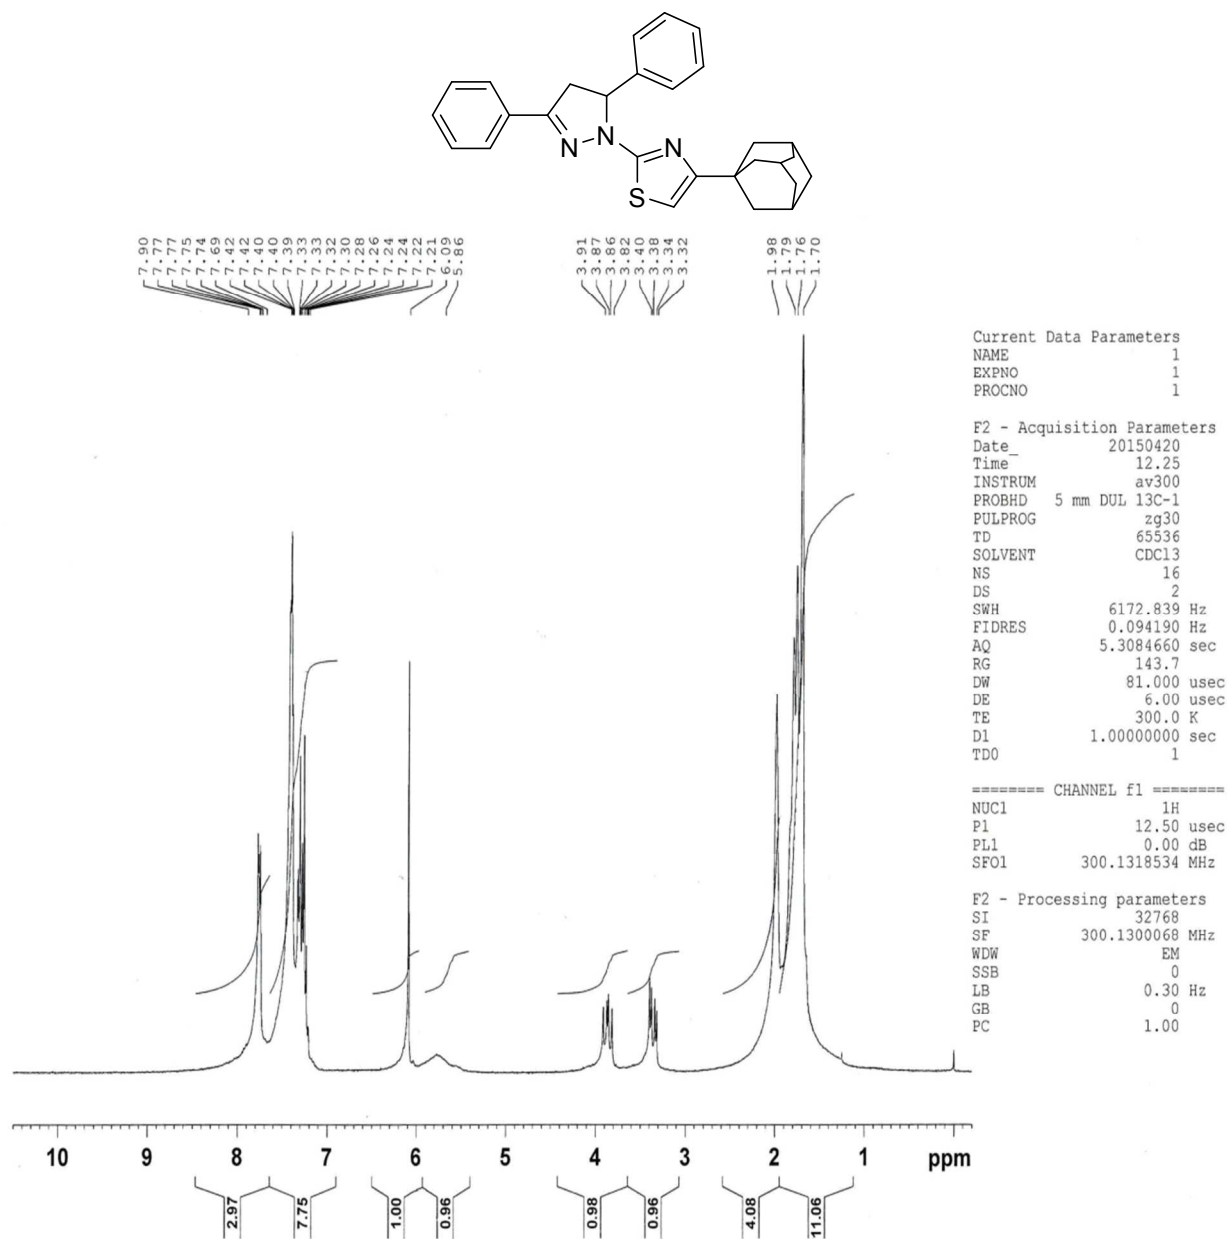

Figure S2:  $^1\text{H}$  NMR spectrum of the compound 3a

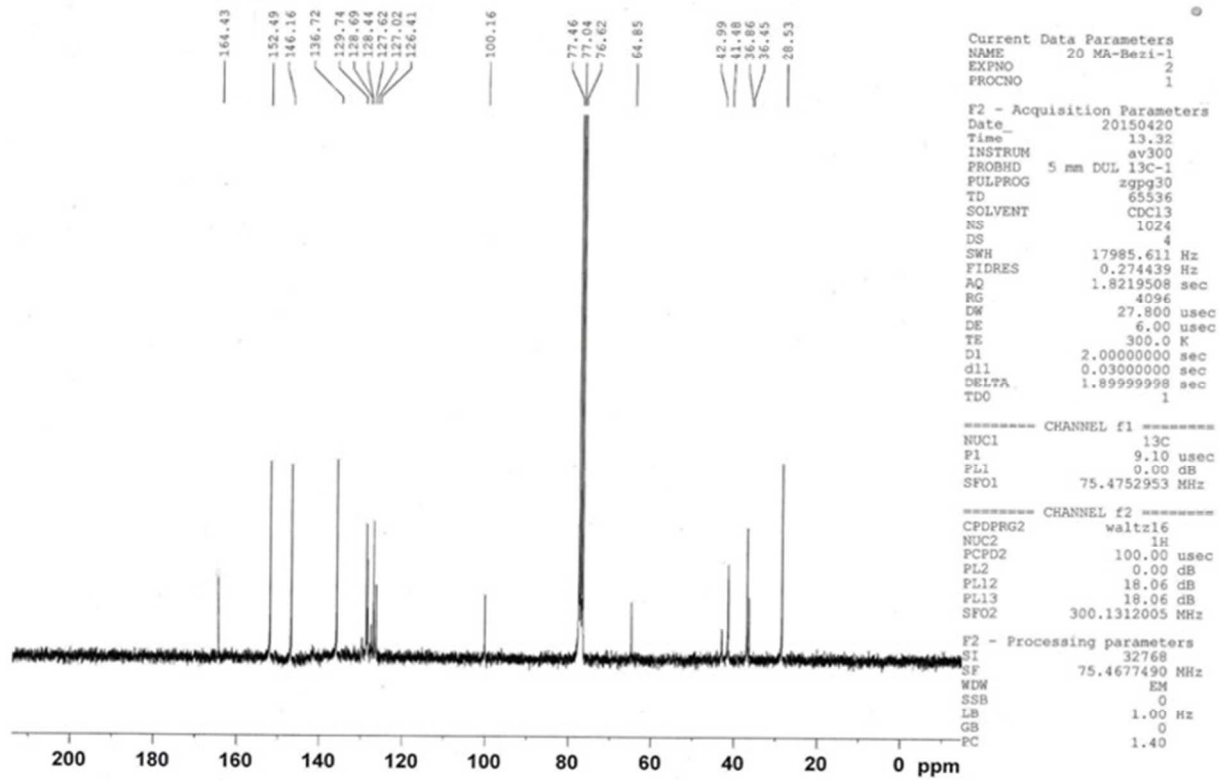

Figure S3:  $^{13}\text{C}$  NMR spectrum of the compound 3a

Comment 1  
Comment 2

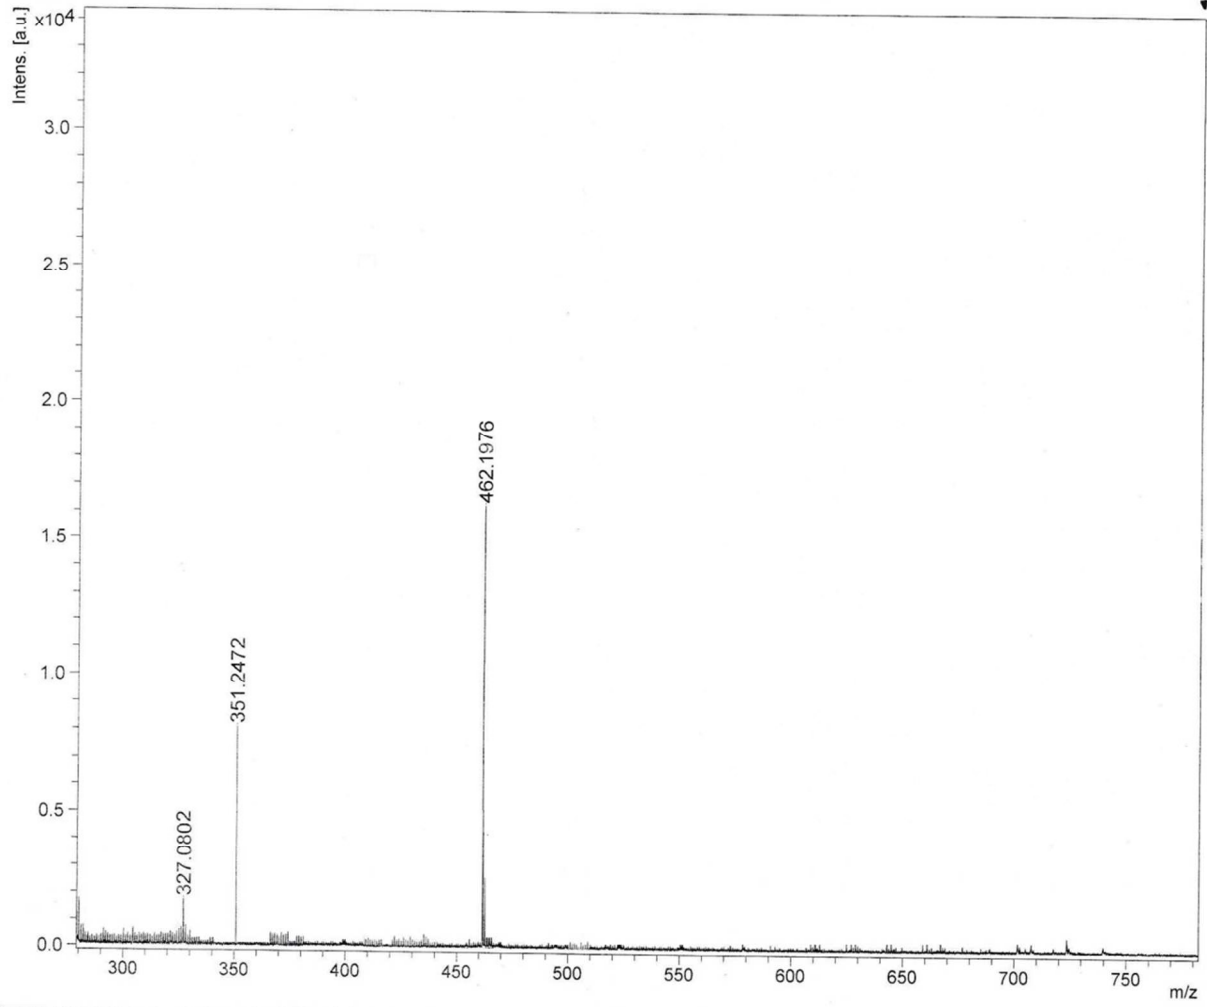

**Figure S4:** Mass spectra of spectrum of the compound 3a



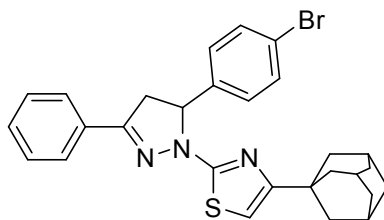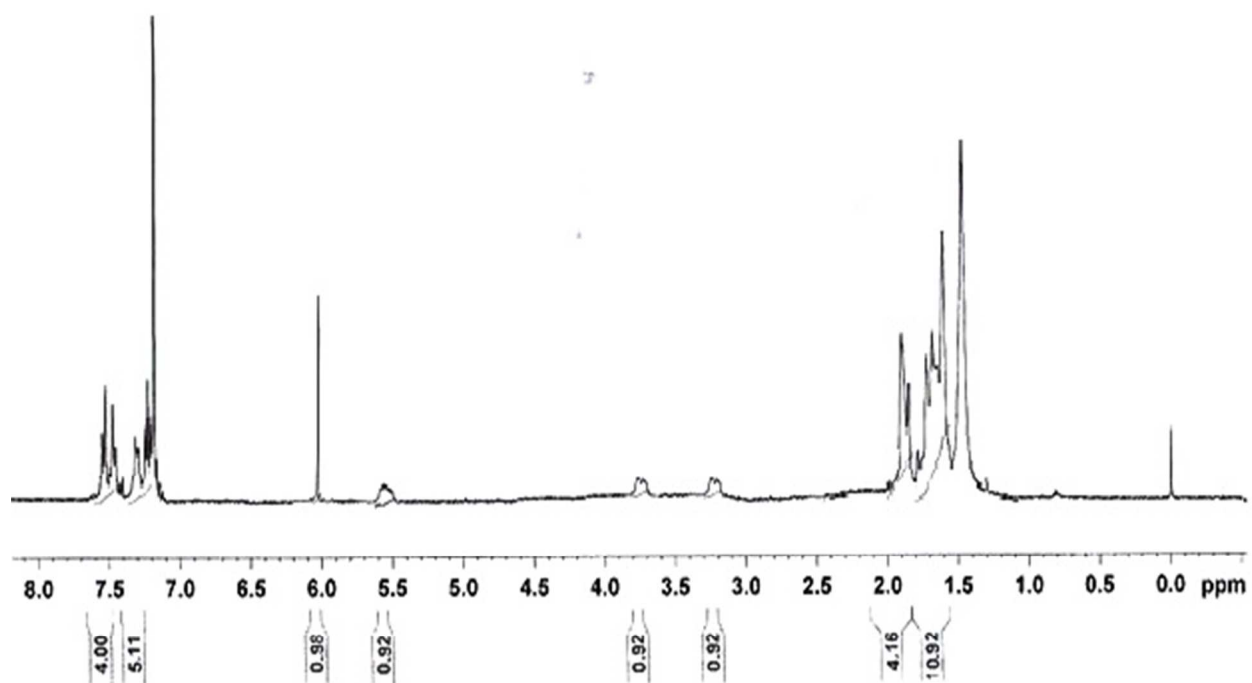

Figure S5: <sup>1</sup>H NMR spectrum of the compound 3b

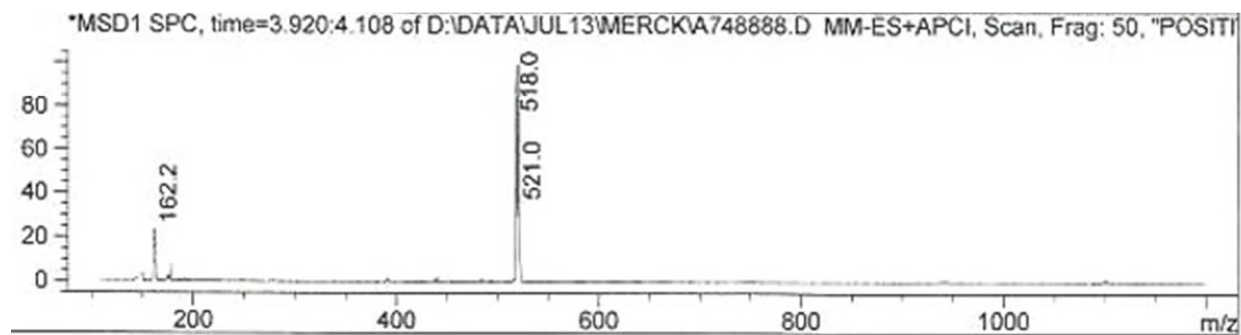

Figure S6: Mass spectra of spectrum of the compound 3b

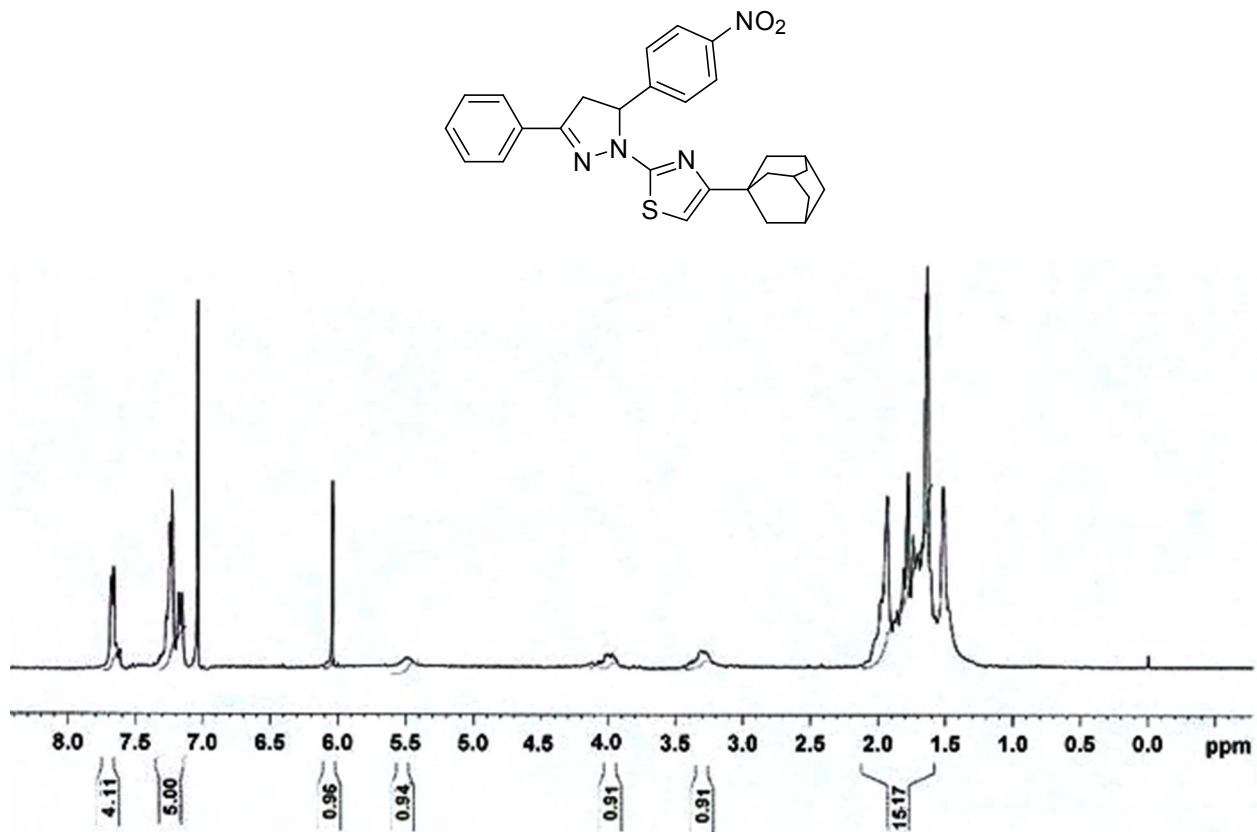

Figure S7: <sup>1</sup>H NMR spectrum of the compound 3c

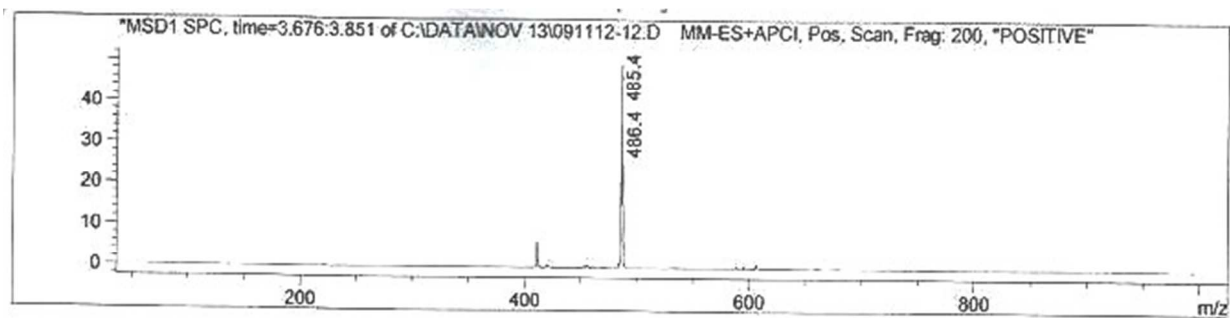

Figure S8: Mass spectra of spectrum of the compound 3c

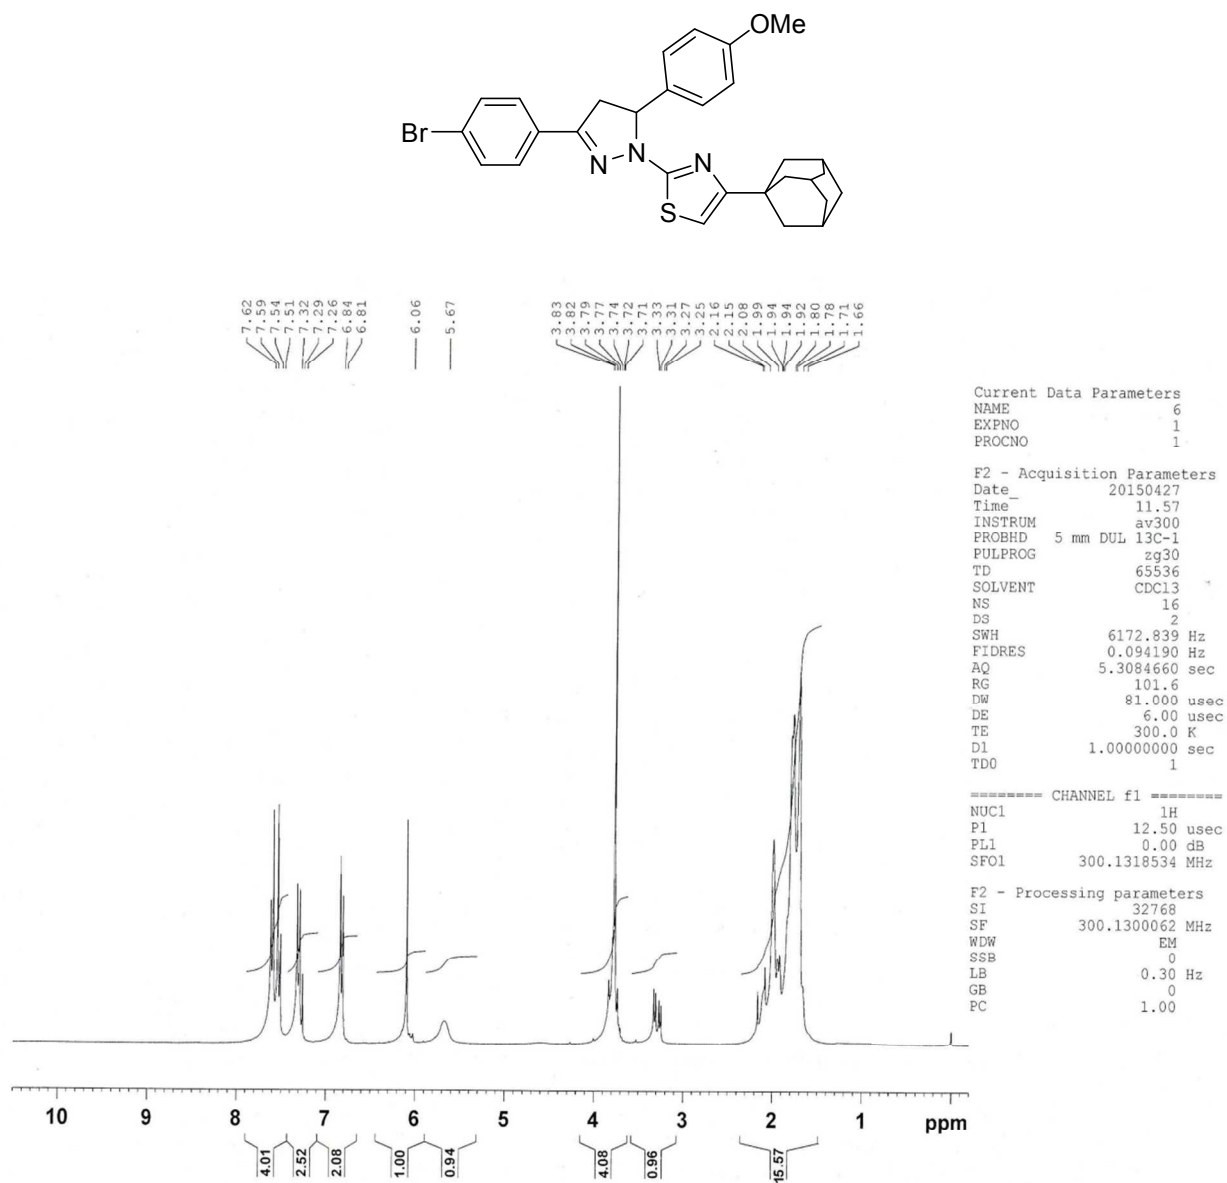

Figure S9:  $^1\text{H}$  NMR spectrum of the compound 3d

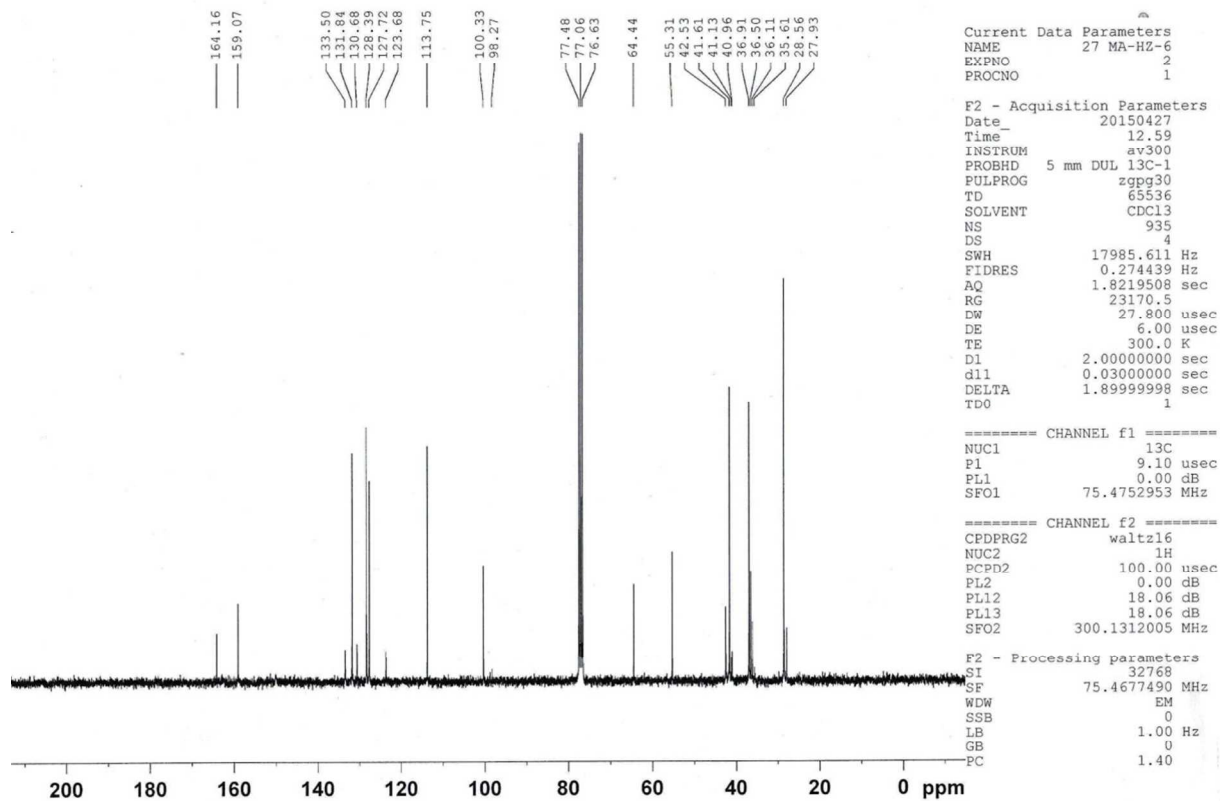

Figure S10: <sup>13</sup>C of spectrum of the compound 3d

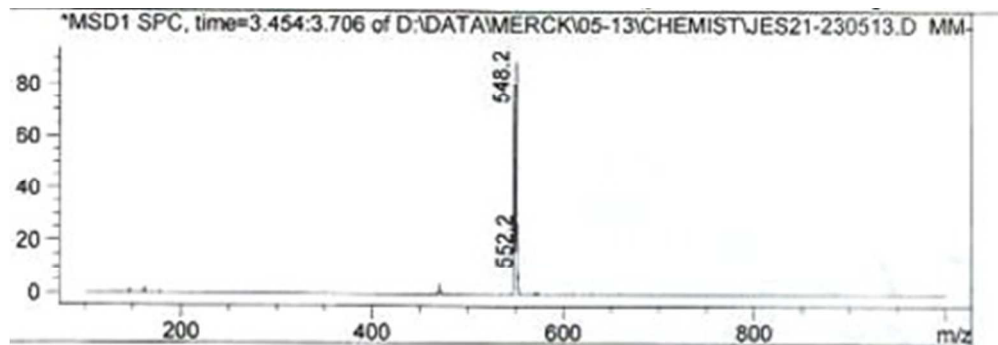

Figure S11: Mass spectrum of the compound 3d

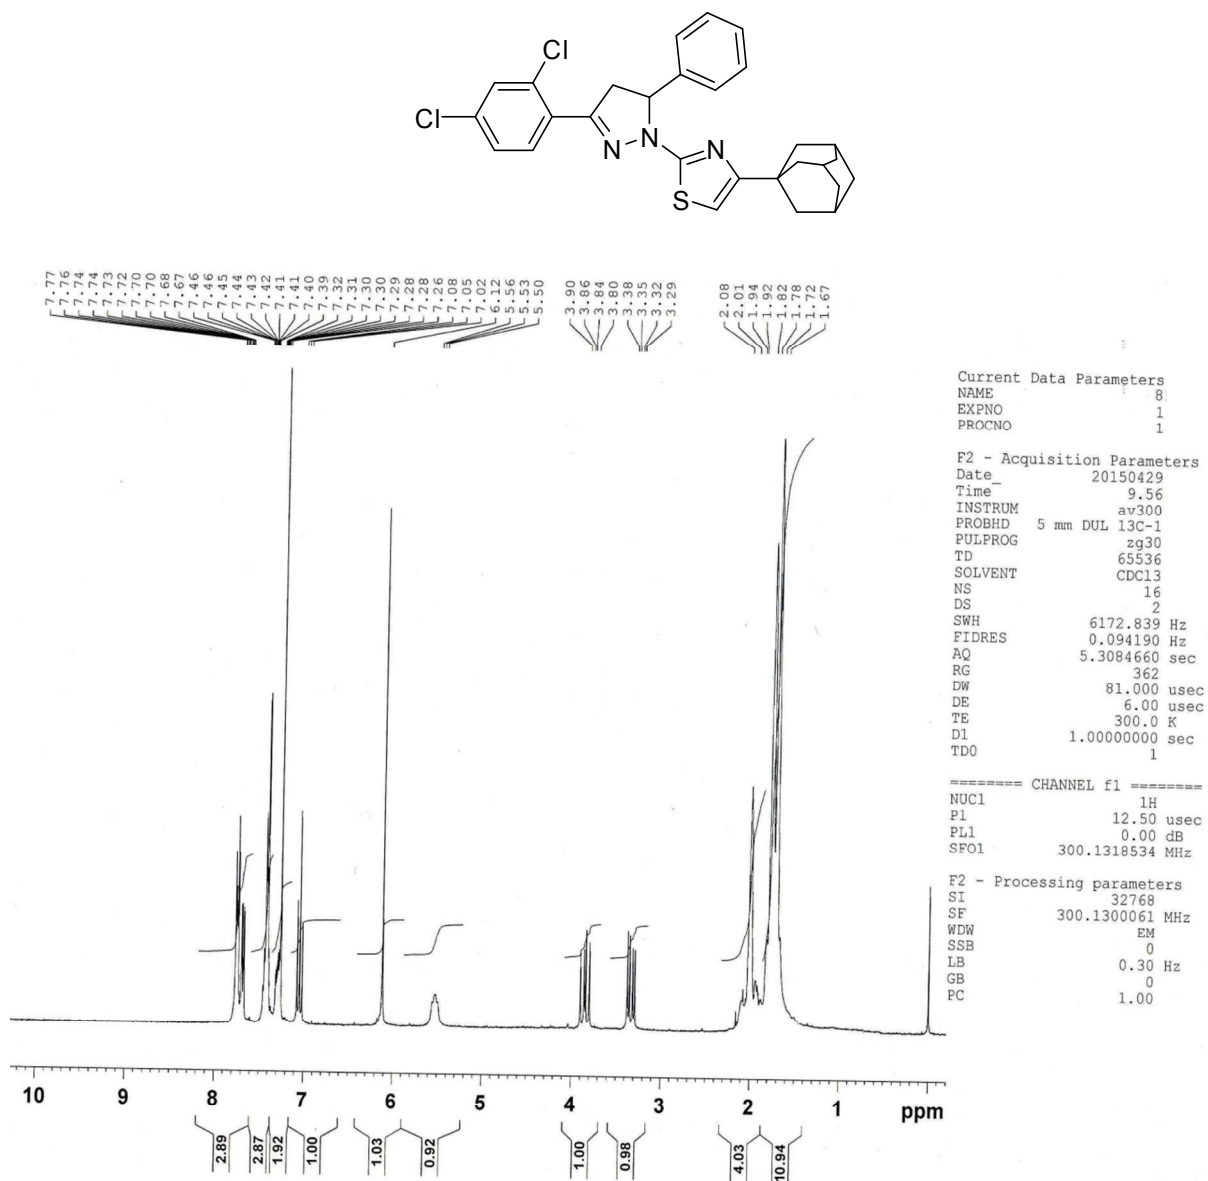

Figure S12: <sup>1</sup>H Spectrum of compound 3e (APP)

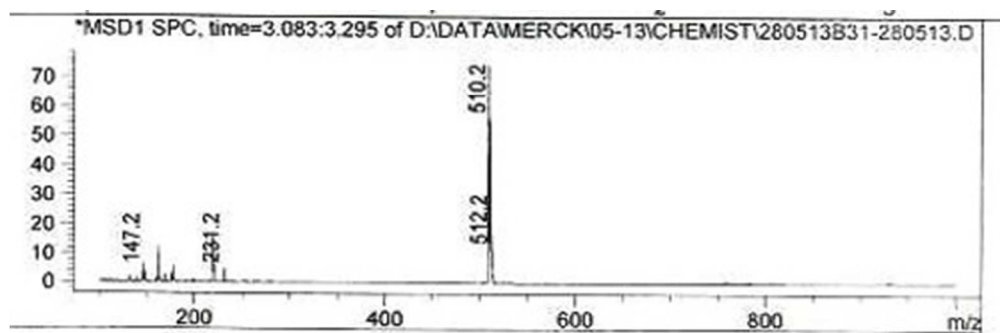

Figure S13: Mass spectrum of compound 3e (APP)

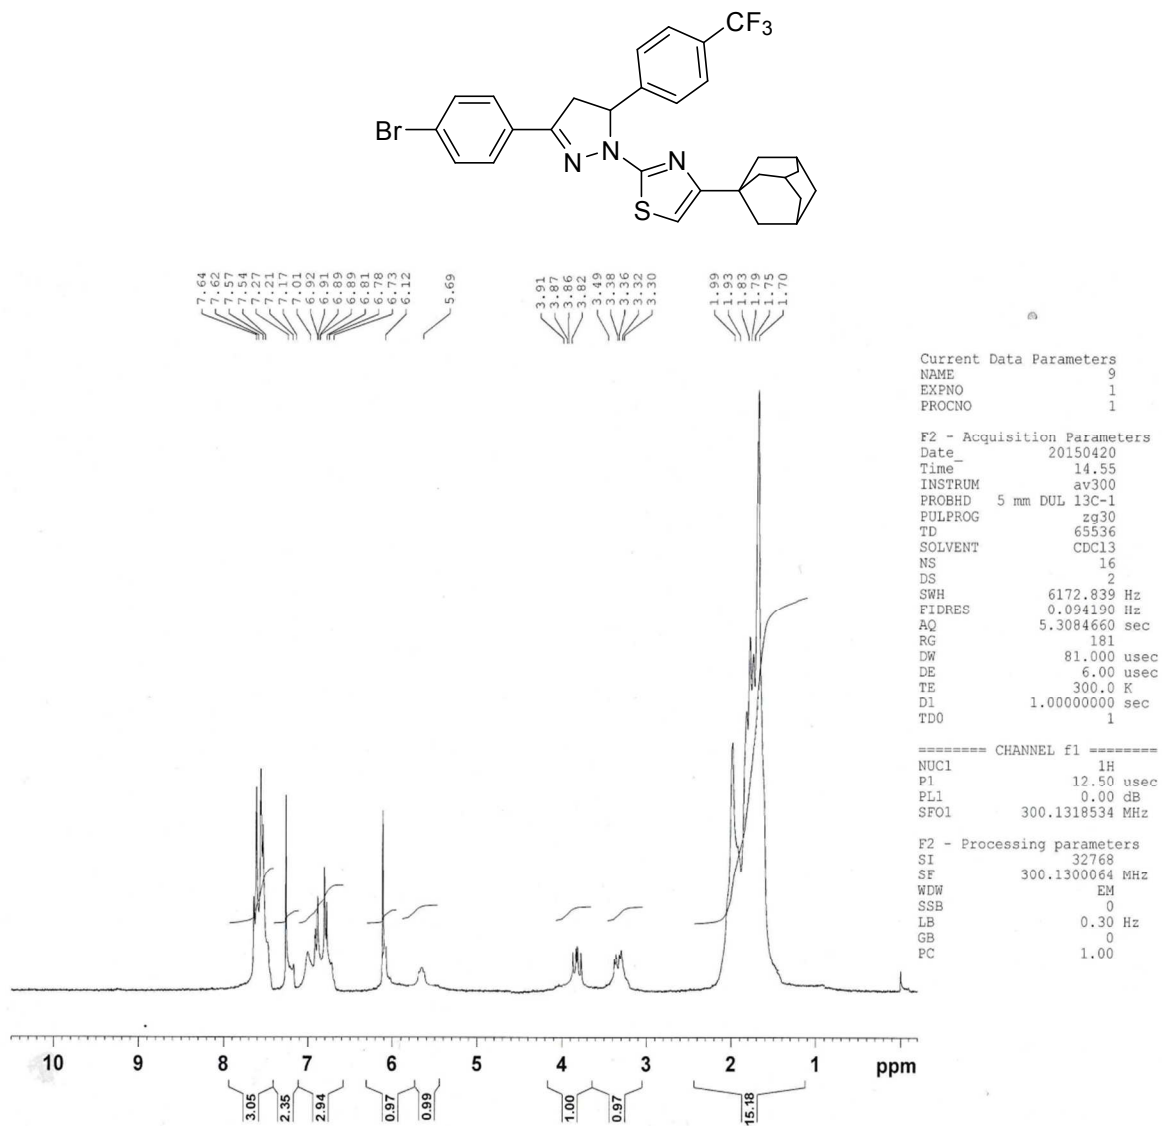

Figure S14: <sup>1</sup>H Spectrum of compound 3f

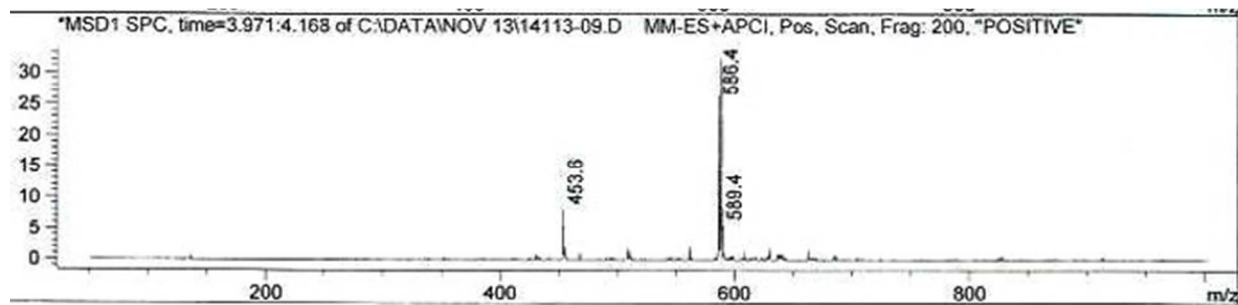

Figure S15: Mass Spectrum of compound 3f

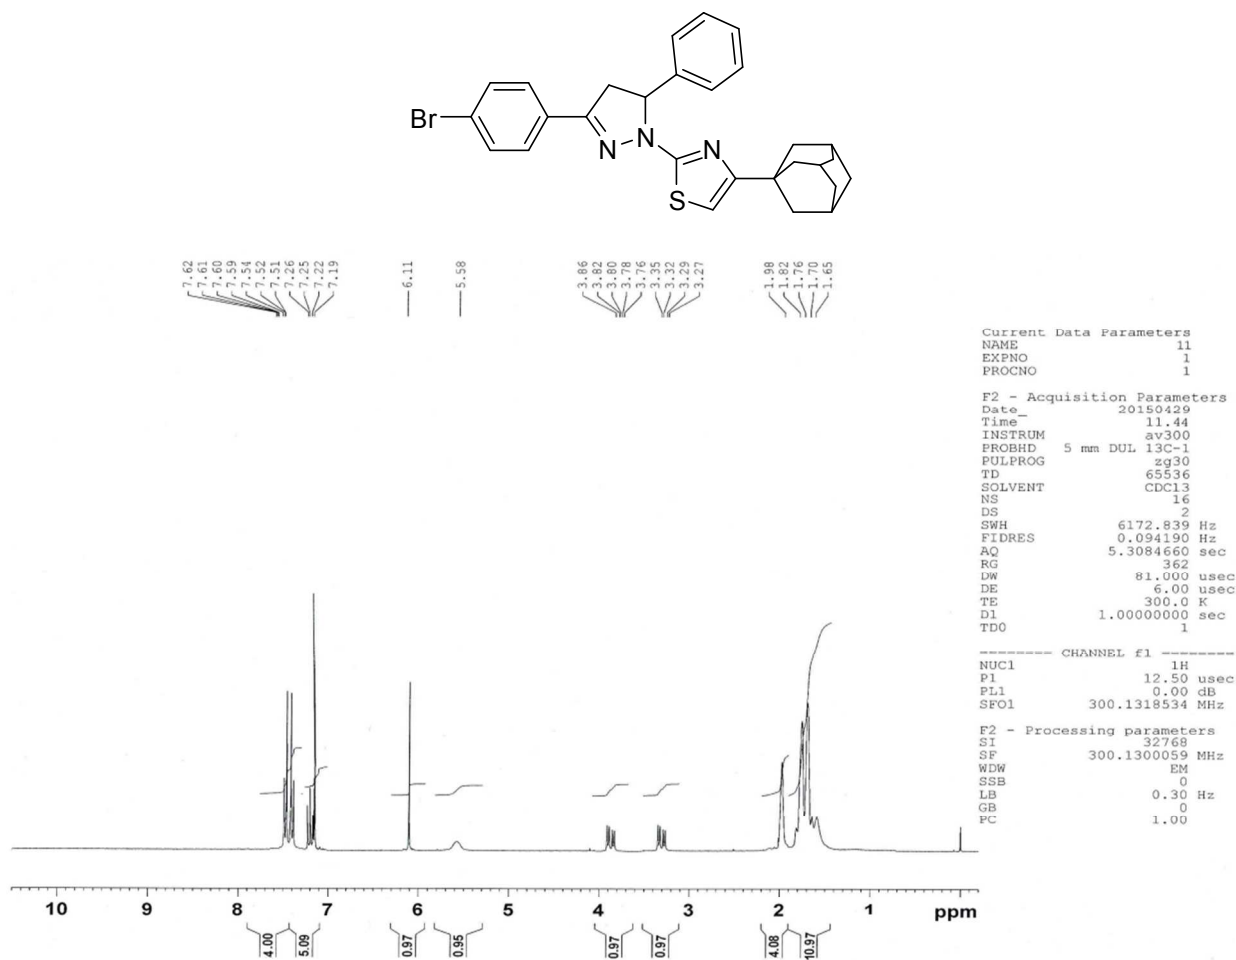

Figure S16:  $^1\text{H}$  Spectrum of compound 3g

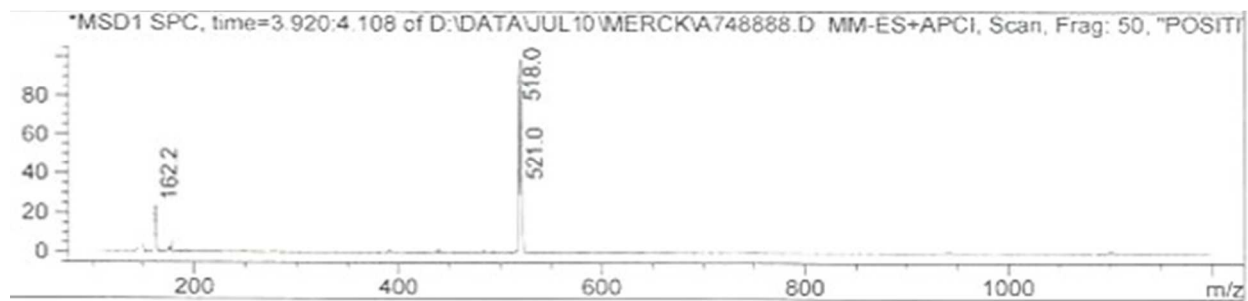

Figure S17: Mass Spectrum of compound 3g

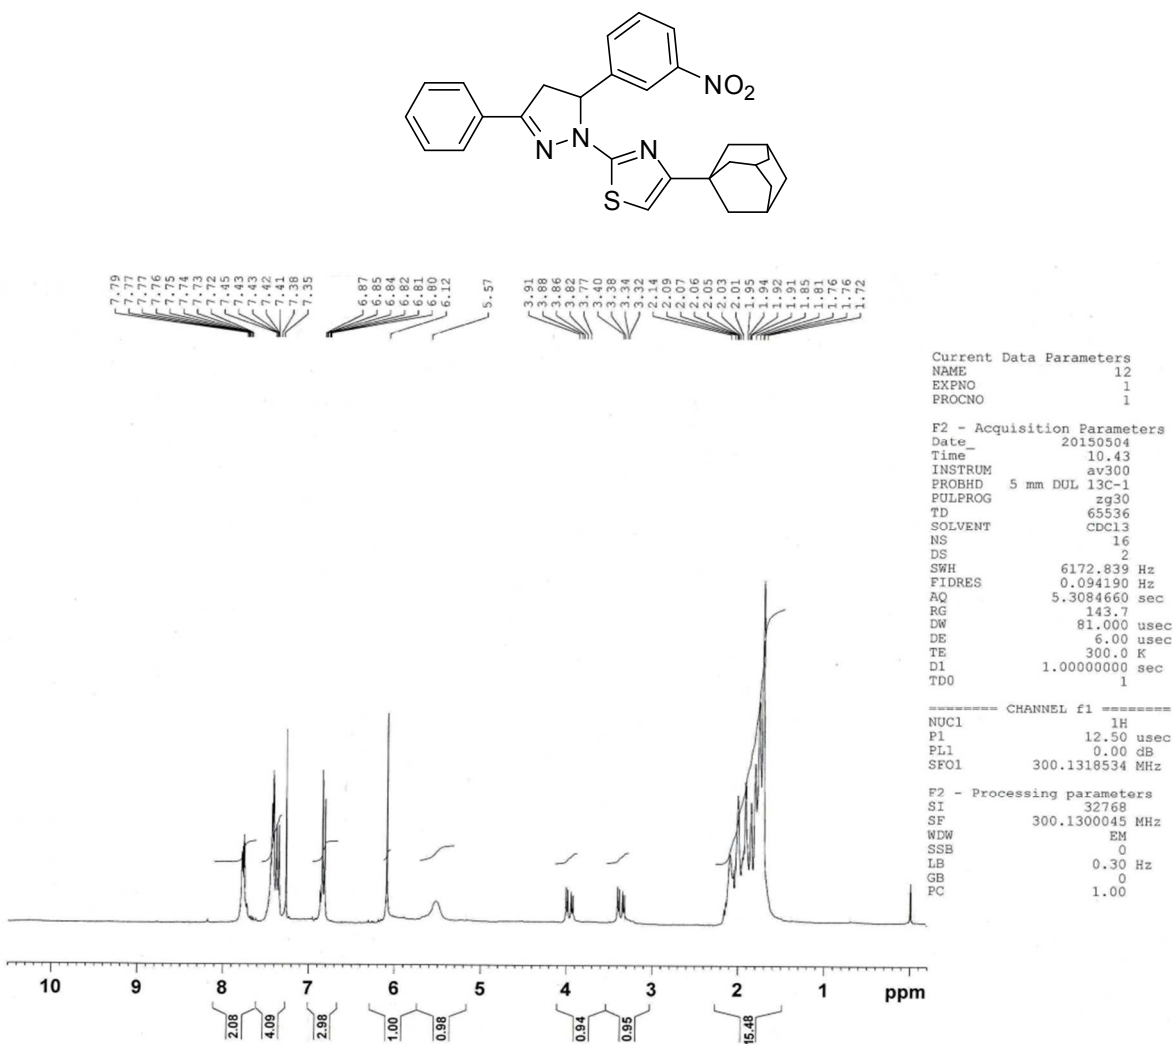

Figure S18: <sup>1</sup>H Spectrum of compound 3h

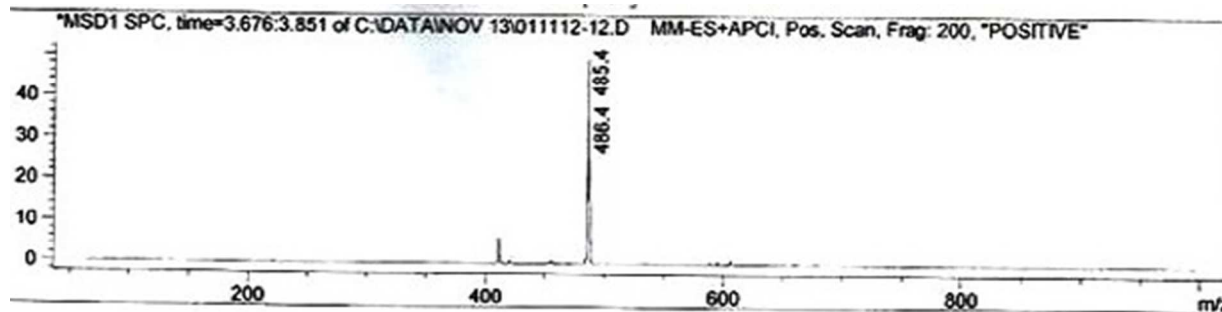

Figure S19: Mass Spectrum of compound 3h



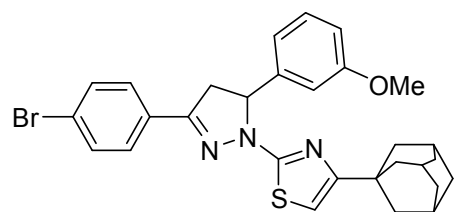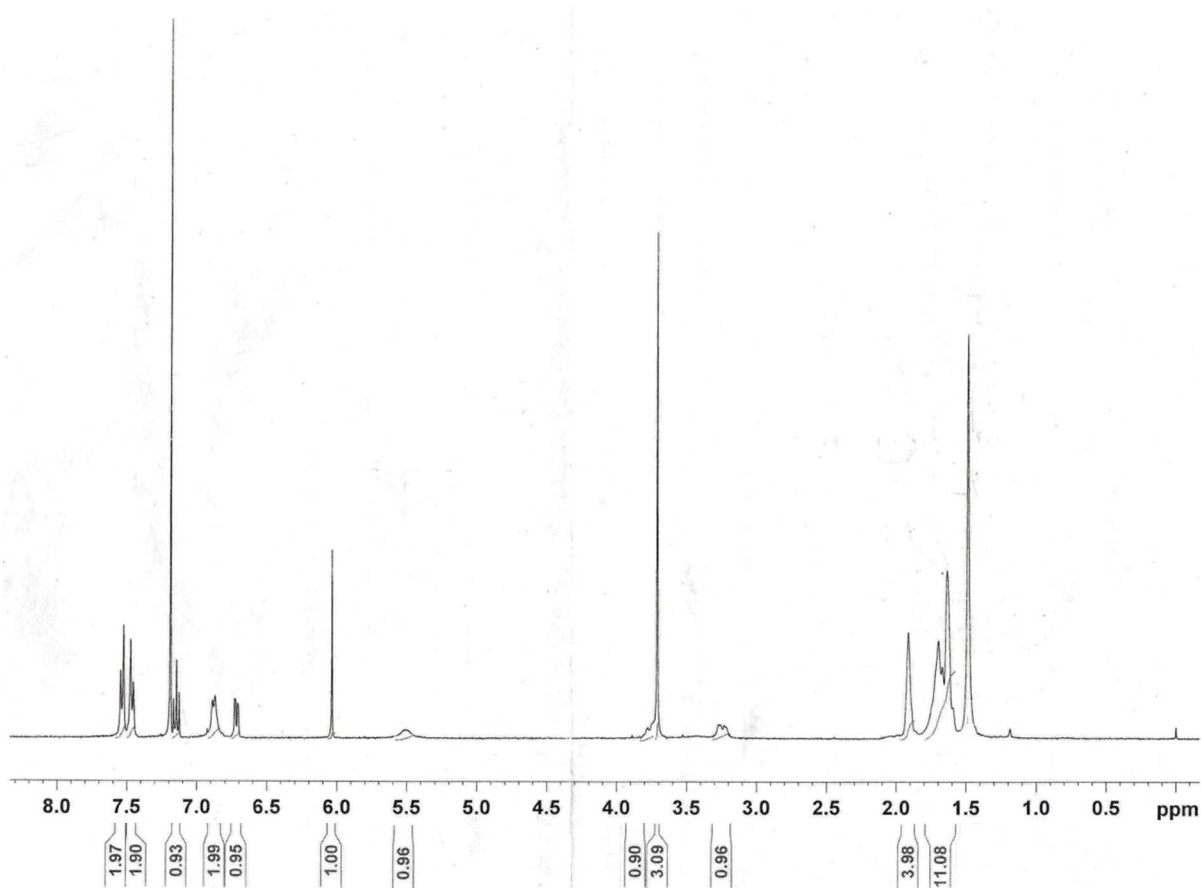

**Figure S20:** <sup>1</sup>H Spectrum of compound 3i

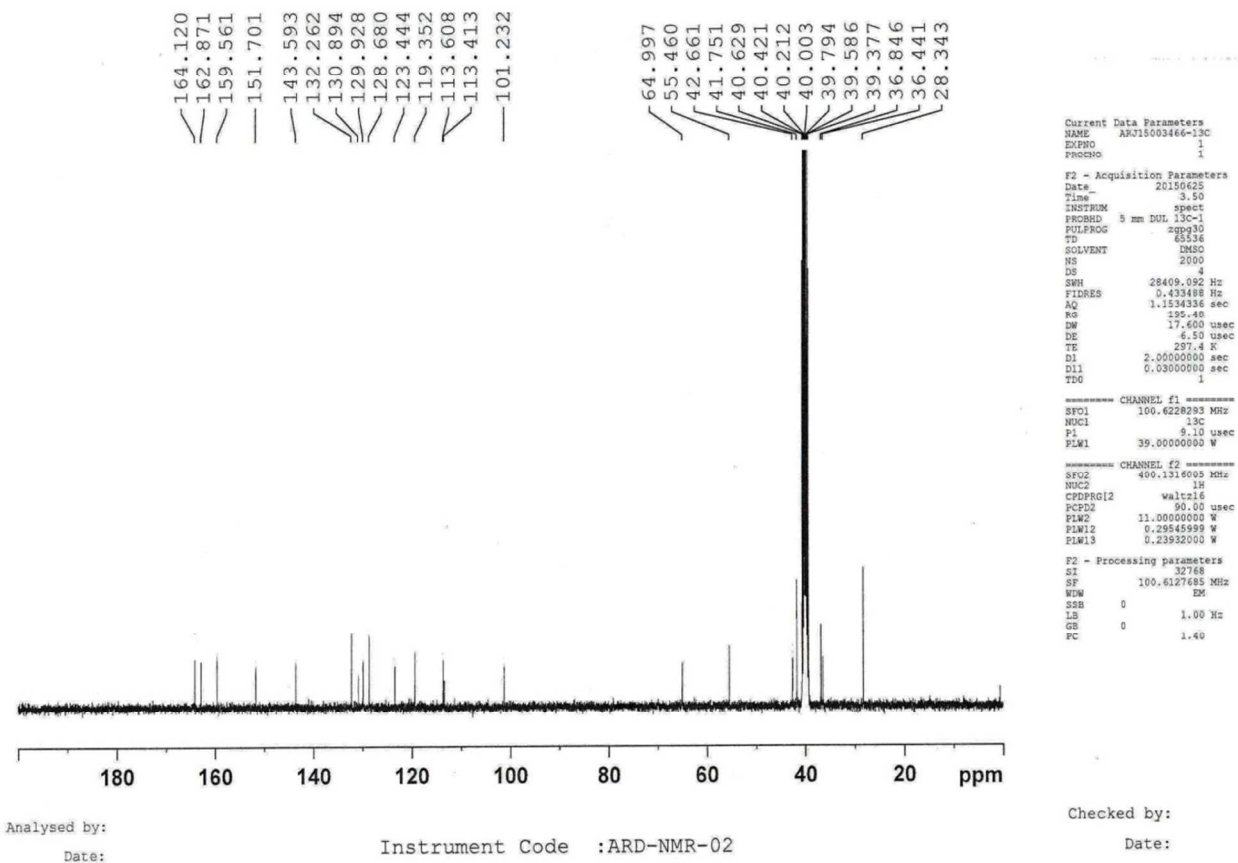

Figure S21: <sup>13</sup>C Spectrum of compound 3i

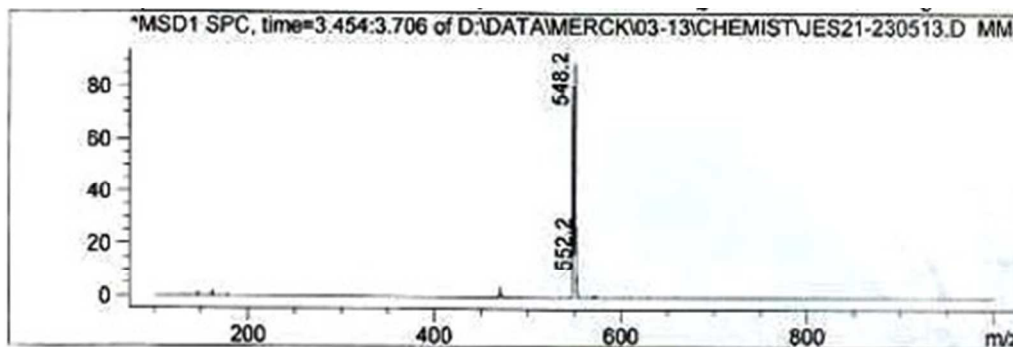

Figure S22: Mass Spectrum of compound 3i

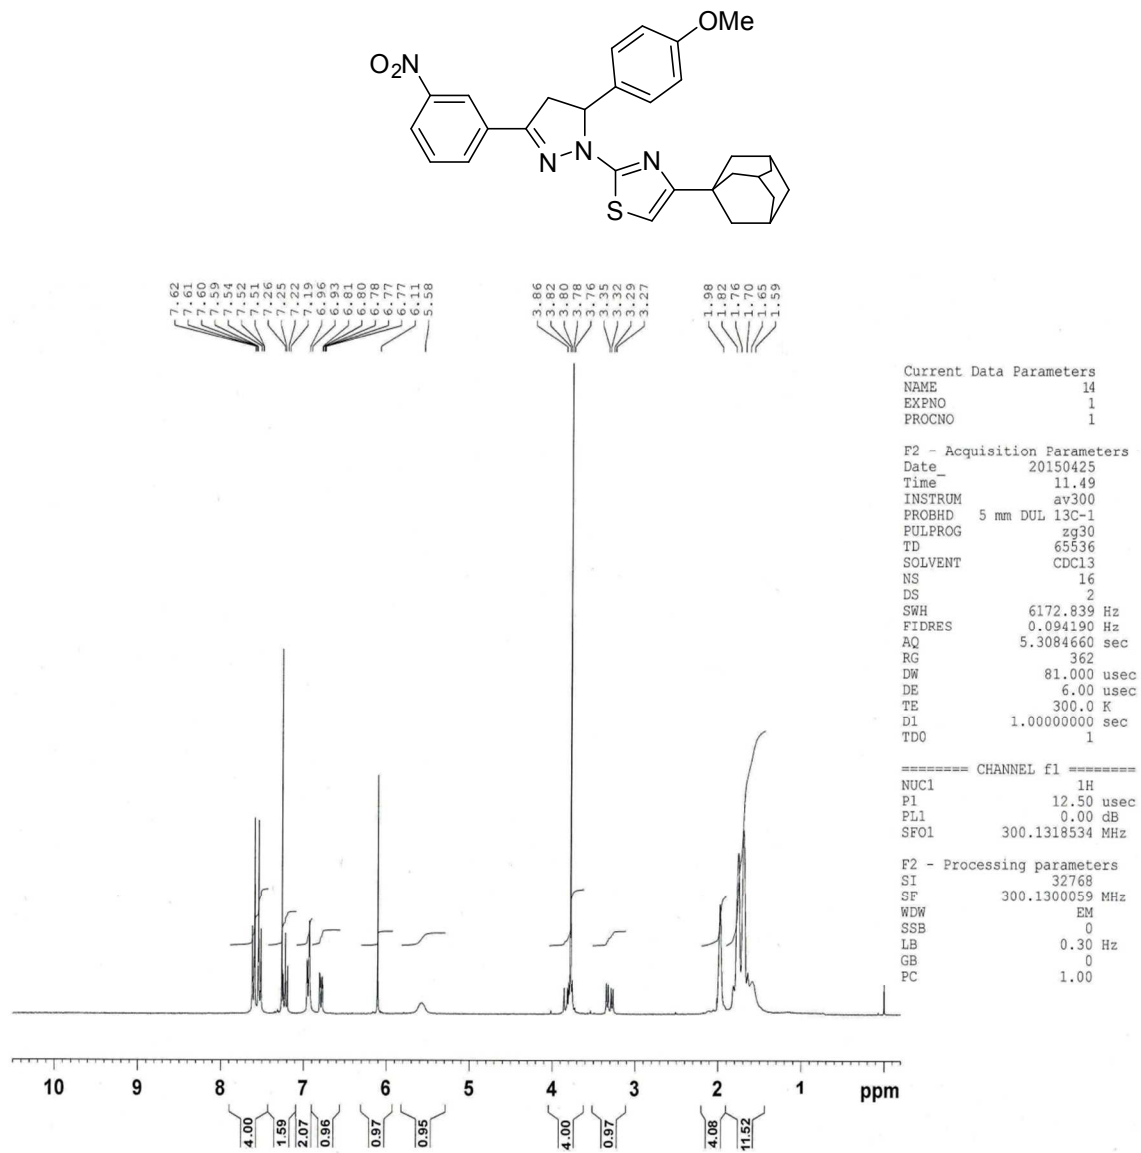

Figure S23: <sup>1</sup>H Spectrum of compound 3j

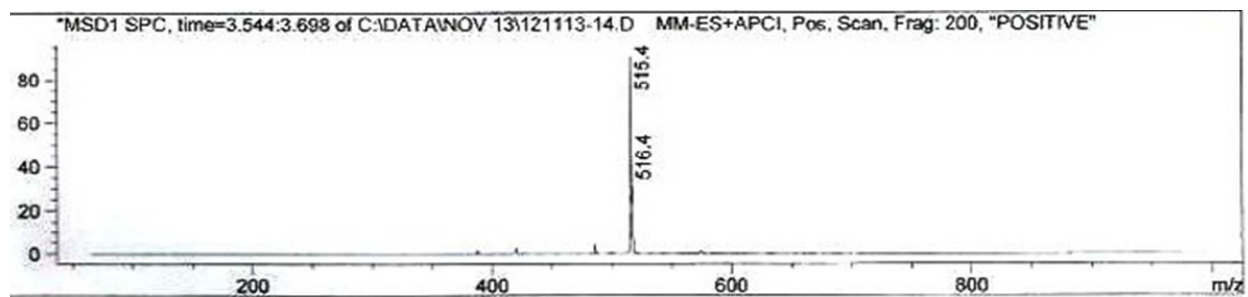

Figure S24: Mass Spectrum of compound 3j

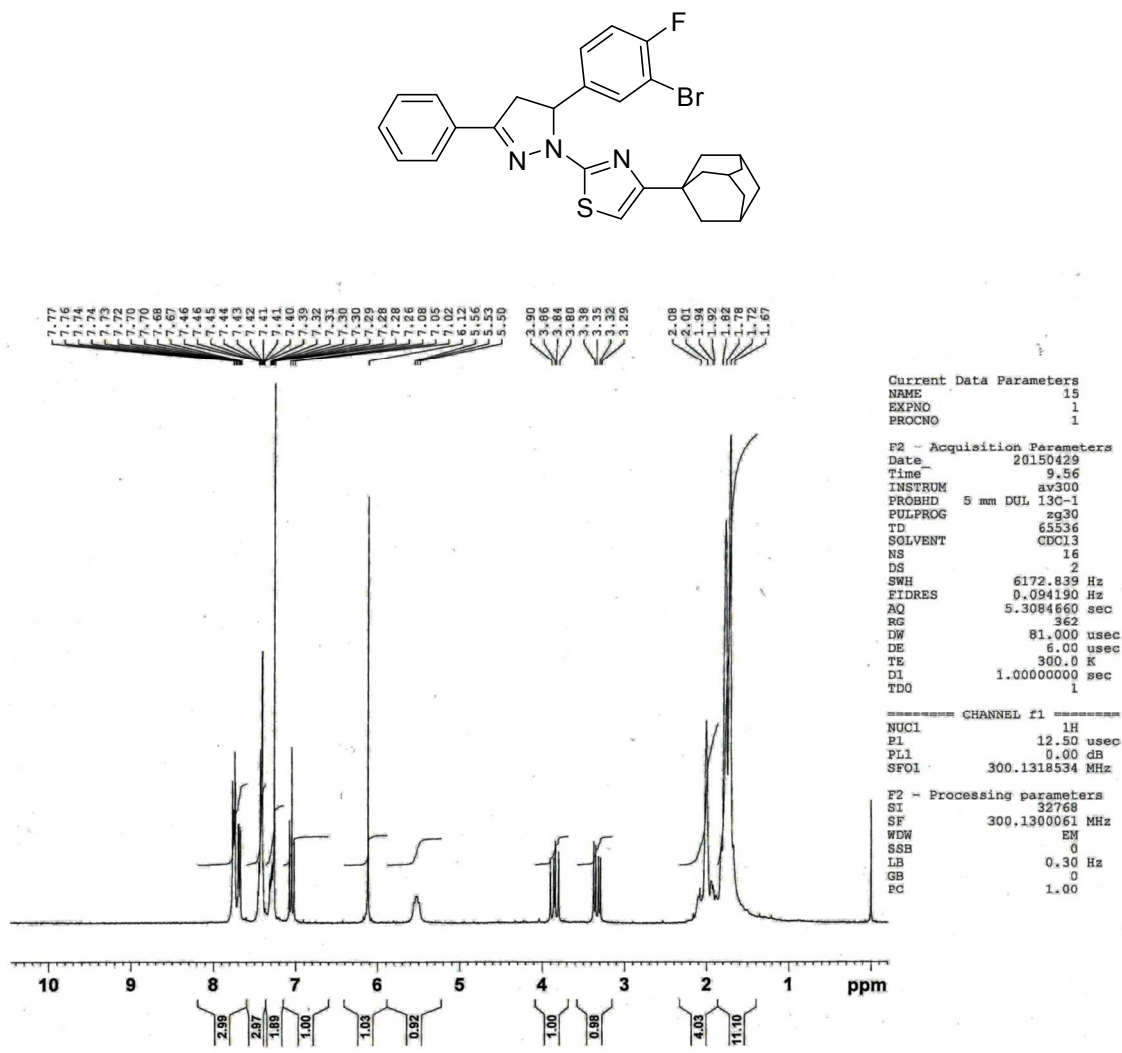

Figure S25:  $^1\text{H}$  Spectrum of compound 3k

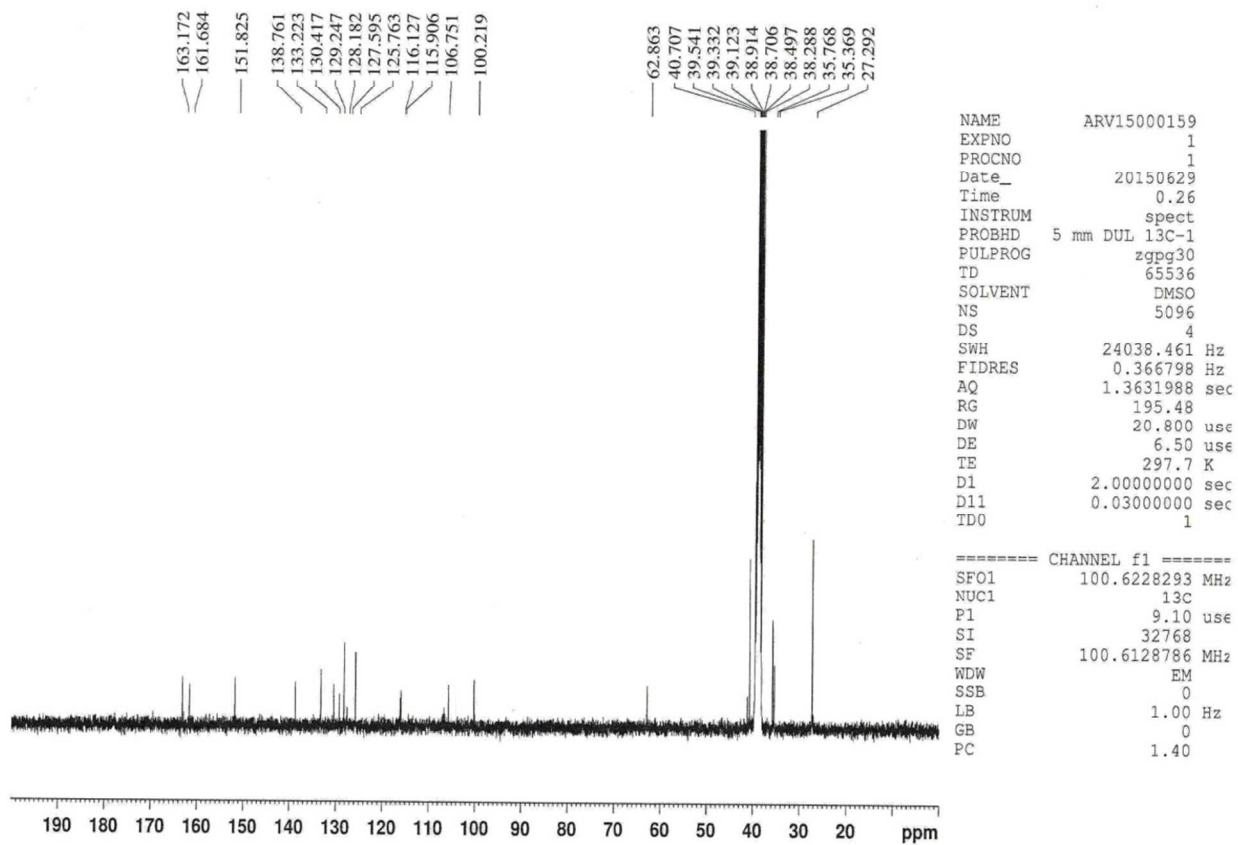

Figure S26: <sup>13</sup>C Spectrum of compound 3k

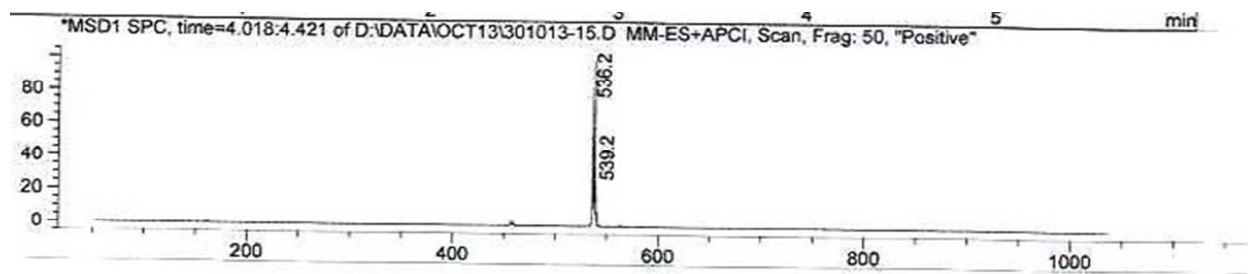

Figure S27: Mass Spectrum of compound 3k

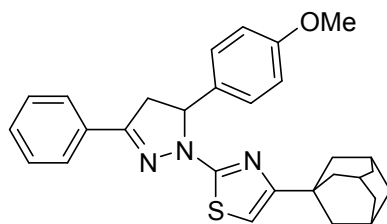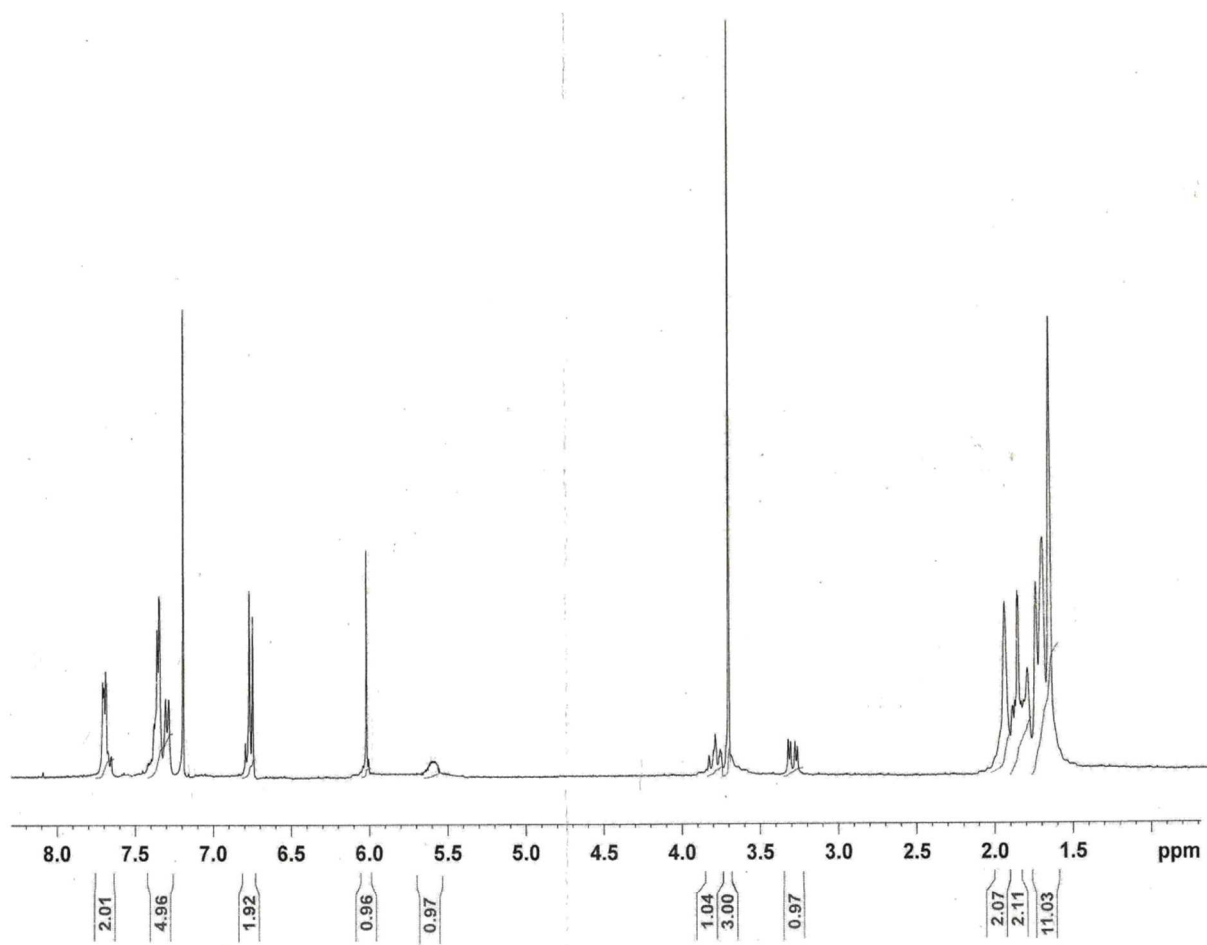

**Figure S28:** <sup>1</sup>H Spectrum of compound 31

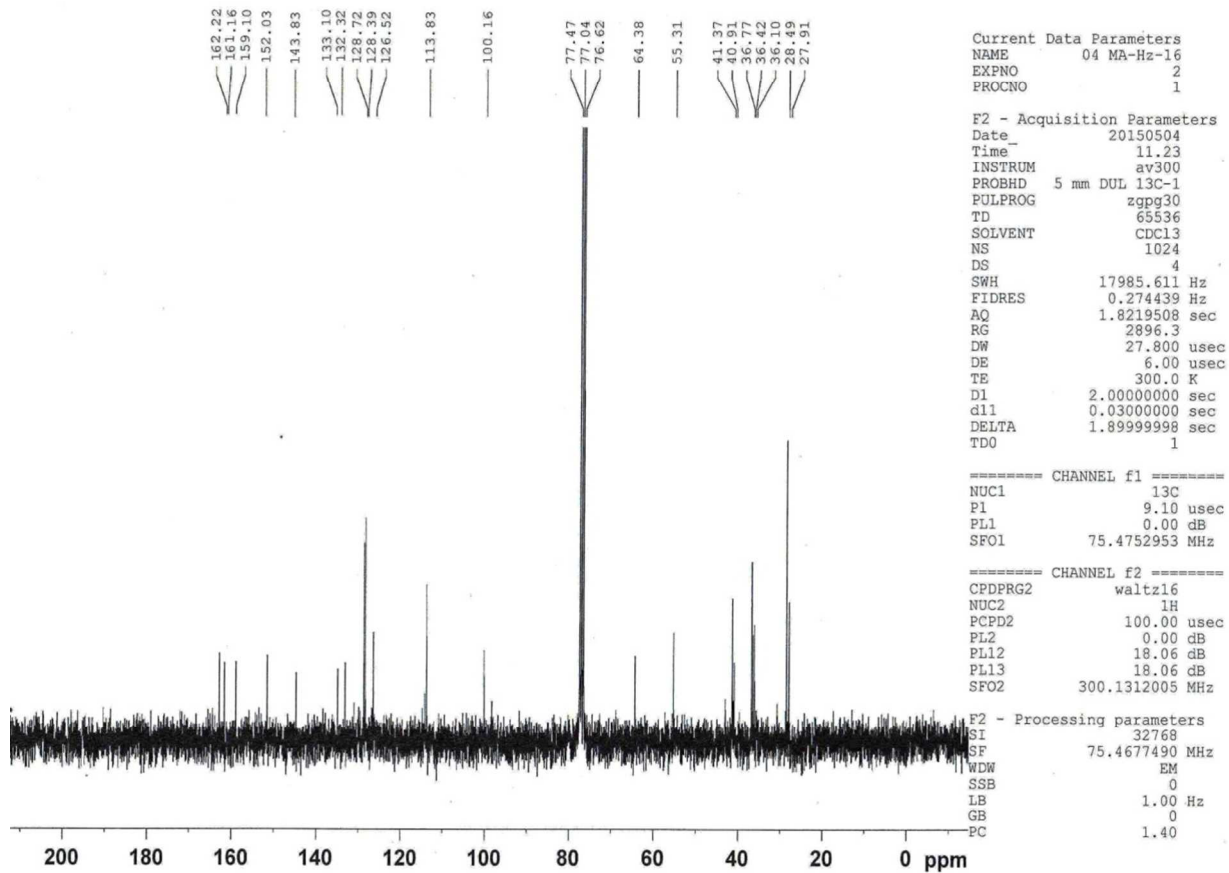

Figure S29: <sup>13</sup>C Spectrum of compound 31

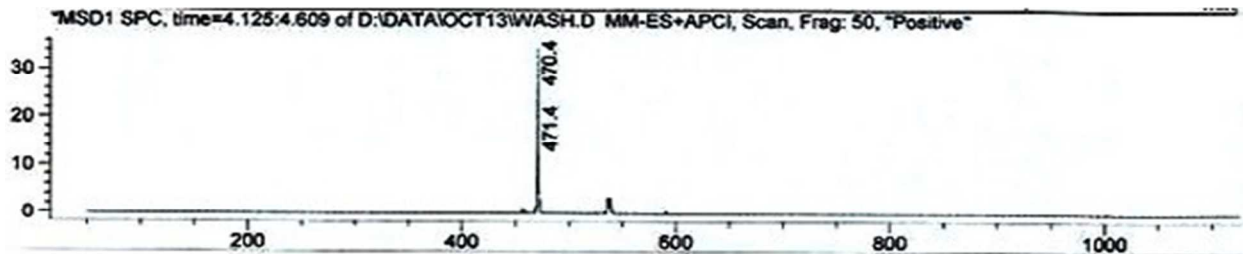

Figure S30: Mass Spectrum of compound 31

**Table S2: *In silico* prediction of human targets for the title compounds based on the Parzen-Rosenblatt**

**Window classifier.**

| Entry | Predicted targets (with corresponding probabilities) |      |                                            |      |                                     |      |                     |      |
|-------|------------------------------------------------------|------|--------------------------------------------|------|-------------------------------------|------|---------------------|------|
| 3a    | Amine oxidase<br>[flavin-containing]<br>A            | 0.10 | Epidermal growth<br>factor receptor        | 0.09 | Cocaine esterase                    | 0.06 |                     |      |
| 3b    | Epidermal growth<br>factor receptor                  | 0.75 |                                            |      |                                     |      |                     |      |
| 3c    | Epidermal growth<br>factor receptor                  | 0.69 |                                            |      |                                     |      |                     |      |
| 3d    | Epidermal growth<br>factor receptor                  | 0.69 |                                            |      |                                     |      |                     |      |
| 3e    | Epidermal growth<br>factor receptor                  | 0.64 |                                            |      |                                     |      |                     |      |
| 3f    | G-protein coupled<br>receptor 55                     | 0.26 | Amine oxidase<br>[flavin-<br>containing] B | 0.08 | Epidermal growth<br>factor receptor | 0.07 | Cocaine<br>esterase | 0.05 |
| 3g    | Epidermal growth<br>factor receptor                  | 0.42 |                                            |      |                                     |      |                     |      |
| 3h    | G-protein coupled<br>receptor 55                     | 0.86 |                                            |      |                                     |      |                     |      |
| 3i    | Epidermal growth<br>factor receptor                  | 0.08 | Amine oxidase<br>[flavin-<br>containing] A | 0.06 |                                     |      |                     |      |
| 3j    | G-protein coupled<br>receptor 55                     | 0.27 | Amine oxidase<br>[flavin-<br>containing] B | 0.08 | Epidermal growth<br>factor receptor | 0.07 | Cocaine<br>esterase | 0.05 |
| 3k    | G-protein coupled<br>receptor 55                     | 0.07 | Epidermal growth<br>factor receptor        | 0.07 | Cocaine esterase                    | 0.06 |                     |      |
| 3l    | Epidermal growth<br>factor receptor                  | 0.16 | Cocaine esterase                           | 0.06 | Liver<br>carboxylesterase<br>1      | 0.05 |                     |      |
